# Supplementary material
Source: Springer Nature journal article supplement (https://www.springermedizin.de/resource/supplementary/12877_2011_778_MOESM1_ESM.pdf/9440256)
Supplement: MOESM1 [file 9440256]

**Total sample = 4,000**

**Residents of nursing homes = 111**

**Invitees for participation  
= 3,889**

**Not interested = 1,502**

**Candidates for recruitment  
of the trial = 2,387**

**Did not meet criteria for  
participation = 1,972**

**Eligible sample =  
201+214=415**
